# Supplementary material for: Thinking Inside the Box: A Novel Approach to Smoke Taint Mitigation Trials
Source: MDPI journal article supplement (doi:10.3390/molecules27051667), 2022-03-03
Supplement: s1 [file s1]

*Supplementary Materials*

# Thinking Inside the Box: a Novel Approach to Smoke Taint Mitigation Trials

Colleen Szeto <sup>1,2</sup>, Renata Ristic <sup>1</sup>, and Kerry Wilkinson <sup>1,2,\*</sup>

<sup>1</sup> Department of Wine Science, Waite Research Institute, The University of Adelaide, PMB 1, Glen Osmond, SA 5064, Australia; colleen.szeto@adelaide.edu.au (C.S.); renata.ristic@adelaide.edu.au (R.R.)

<sup>2</sup> The Australian Research Council Training Centre for Innovative Wine Production, PMB1, Glen Osmond, SA 5064, Australia

\* Correspondence: [kerry.wilkinson@adelaide.edu.au](mailto:kerry.wilkinson@adelaide.edu.au) (K.W.); Tel: +61-8-8313-7360

**Table S1.** Concentrations of volatile phenols ( $\mu\text{g/L}$ ) in grapes exposed to smoke post-harvest, according to spatial position of bunches within the smoke box.

| Vertical | Horizontal | Guaiacol     | 4-Methyl<br>Guaiacol | Phenol       | <i>o</i> -Cresol | <i>m</i> -Cresol | <i>p</i> -Cresol | Syringol    | 4-Methyl<br>Syringol |
|----------|------------|--------------|----------------------|--------------|------------------|------------------|------------------|-------------|----------------------|
| Top      | Left       | 145 $\pm$ 36 | 25 $\pm$ 7           | 199 $\pm$ 48 | 61 $\pm$ 15      | 46 $\pm$ 11      | 12 $\pm$ 3       | 51 $\pm$ 13 | 6 $\pm$ 2            |
| Top      | Center     | 122 $\pm$ 22 | 20 $\pm$ 4           | 170 $\pm$ 19 | 49 $\pm$ 5       | 39 $\pm$ 4       | 11 $\pm$ 1       | 47 $\pm$ 15 | 6 $\pm$ 2            |
| Top      | Right      | 123 $\pm$ 22 | 22 $\pm$ 4           | 173 $\pm$ 20 | 54 $\pm$ 6       | 40 $\pm$ 5       | 9 $\pm$ 2        | 45 $\pm$ 10 | 6 $\pm$ 1            |
| Middle   | Left       | 119 $\pm$ 30 | 20 $\pm$ 6           | 156 $\pm$ 28 | 49 $\pm$ 10      | 37 $\pm$ 7       | 8 $\pm$ 3        | 45 $\pm$ 16 | 6 $\pm$ 2            |
| Middle   | Center     | 137 $\pm$ 42 | 22 $\pm$ 7           | 183 $\pm$ 43 | 56 $\pm$ 12      | 43 $\pm$ 10      | 8 $\pm$ 2        | 49 $\pm$ 17 | 6 $\pm$ 2            |
| Middle   | Right      | 122 $\pm$ 15 | 20 $\pm$ 3           | 178 $\pm$ 13 | 52 $\pm$ 2       | 39 $\pm$ 2       | 9 $\pm$ 3        | 45 $\pm$ 14 | 6 $\pm$ 2            |
| Bottom   | Left       | 100 $\pm$ 33 | 17 $\pm$ 6           | 130 $\pm$ 30 | 39 $\pm$ 9       | 30 $\pm$ 8       | 8 $\pm$ 2        | 41 $\pm$ 17 | 6 $\pm$ 2            |
| Bottom   | Center     | 122 $\pm$ 37 | 20 $\pm$ 6           | 152 $\pm$ 30 | 47 $\pm$ 9       | 36 $\pm$ 8       | 6 $\pm$ 1        | 45 $\pm$ 17 | 6 $\pm$ 2            |
| Bottom   | Right      | 154 $\pm$ 37 | 25 $\pm$ 6           | 218 $\pm$ 37 | 64 $\pm$ 10      | 50 $\pm$ 8       | 11 $\pm$ 4       | 55 $\pm$ 17 | 7 $\pm$ 2            |
| <i>p</i> |            | 0.976        | 0.981                | 0.724        | 0.750            | 0.773            | 0.801            | 0.999       | 1.000                |

Values are means of three replicates ( $n = 3$ )  $\pm$  standard error. No statistical significance was detected as a function of bunch position during smoke treatment ( $p = 0.05$ , one way ANOVA).

**Table S2.** Cross-study comparison of volatile phenol glycoconjugate concentrations ( $\mu\text{g/kg}$ ) measured in grapes following exposure to smoke or gaseous volatile phenols, under different experimental conditions.

| Variety                   | Model System    | Timing and Duration of Smoke Exposure | Sampling Time  | Sample Density                | GuR          | CrR          | SyGG         | MSyGB       | CrPG           | GuPG           | References    |
|---------------------------|-----------------|---------------------------------------|----------------|-------------------------------|--------------|--------------|--------------|-------------|----------------|----------------|---------------|
| Semillon                  | smoke box       | 0.5 h, post-harvest                   | 7 d post-smoke | 9 bunches/0.96 m <sup>3</sup> | 110 $\pm$ 10 | 114 $\pm$ 10 | 55 $\pm$ 7   | 9 $\pm$ 1   | 213 $\pm$ 25   | 242 $\pm$ 27   | current study |
| Viognier                  | smoke tent      | 1 h, 1 week pre-harvest               | 7 d post-smoke | 3 vines/30 m <sup>3</sup>     | tr           | 3 $\pm$ 0.3  | 39 $\pm$ 9   | 8 $\pm$ 2   | 21 $\pm$ 3     | 40 $\pm$ 2     | [27]          |
| Viognier                  | smoke tent      | 1 h, post-harvest                     | 7 d post-smoke | 3 vines/30 m <sup>3</sup>     | tr           | 3 $\pm$ 0.3  | 40 $\pm$ 8   | 9 $\pm$ 1   | 23 $\pm$ 0.5   | 43 $\pm$ 2     | [27]          |
| Cabernet Sauvignon        | smoke tent      | 1 h, 1 week pre-harvest               | 7 d post-smoke | 3 vines/30 m <sup>3</sup>     | tr           | 3 $\pm$ 0.5  | 12 $\pm$ 4   | 2 $\pm$ 0.5 | 3 $\pm$ 0.4    | 3 $\pm$ 0.4    | [27]          |
| Cabernet Sauvignon        | smoke tent      | 1 h, post-harvest                     | 7 d post-smoke | 3 vines/30 m <sup>3</sup>     | tr           | 3 $\pm$ 0.5  | 9 $\pm$ 2    | 1 $\pm$ 0.3 | 3 $\pm$ 0.2    | 3 $\pm$ 0.3    | [27]          |
| Viognier                  | gaseous phenols | 60 h, post-harvest                    | immediate      | 3 bunches/0.16 m <sup>3</sup> | 25 $\pm$ 4   | 205 $\pm$ 36 | 45 $\pm$ 5   | 17 $\pm$ 3  | 2114 $\pm$ 135 | 1111 $\pm$ 104 | [27]          |
| Cabernet Sauvignon        | gaseous phenols | 60 h, post-harvest                    | immediate      | 3 bunches/0.16 m <sup>3</sup> | 90 $\pm$ 14  | 571 $\pm$ 74 | 102 $\pm$ 17 | 26 $\pm$ 5  | 1196 $\pm$ 223 | 482 $\pm$ 122  | [27]          |
| Muscat Gordo <sup>1</sup> | gaseous phenols | 60 h, post-harvest                    | immediate      | 3 bunches/0.16 m <sup>3</sup> | 10 $\pm$ 4   | 67 $\pm$ 23  | 88 $\pm$ 37  | -           | 299 $\pm$ 91   | 197 $\pm$ 54   | [24]          |
| Shiraz                    | gaseous phenols | 60 h, post-harvest                    | immediate      | 3 bunches/0.16 m <sup>3</sup> | 24 $\pm$ 6   | 218 $\pm$ 51 | 6 $\pm$ 0.5  | -           | 197 $\pm$ 19   | 105 $\pm$ 6    | [24]          |
| Cabernet Sauvignon        | smoke tent      | 1 h, 7-10 days post-veraison          | 7 d post-smoke | 3 vines/30 m <sup>3</sup>     | 11 $\pm$ 2   | 89 $\pm$ 12  | 455 $\pm$ 86 | 62 $\pm$ 10 | 217 $\pm$ 34   | 185 $\pm$ 33   | [18]          |
| Merlot                    | smoke tent      | 1 h, 14 days post-veraison            | 7 d post-smoke | 3 vines/30 m <sup>3</sup>     | 22 $\pm$ 12  | 113 $\pm$ 64 | 176 $\pm$ 96 | -           | 300 $\pm$ 156  | 283 $\pm$ 189  | [21]          |

Data are reported as means  $\pm$  standard error values; tr = trace (i.e., 0.5–1  $\mu\text{g/kg}$ ).

Gu = guaiacol; Cr = cresol; Sy = syringol; MSy = 4-methylsyringol; PG = pentose-glucoside; GG = glucose-glucoside (gentiobioside); R = rutinoid.

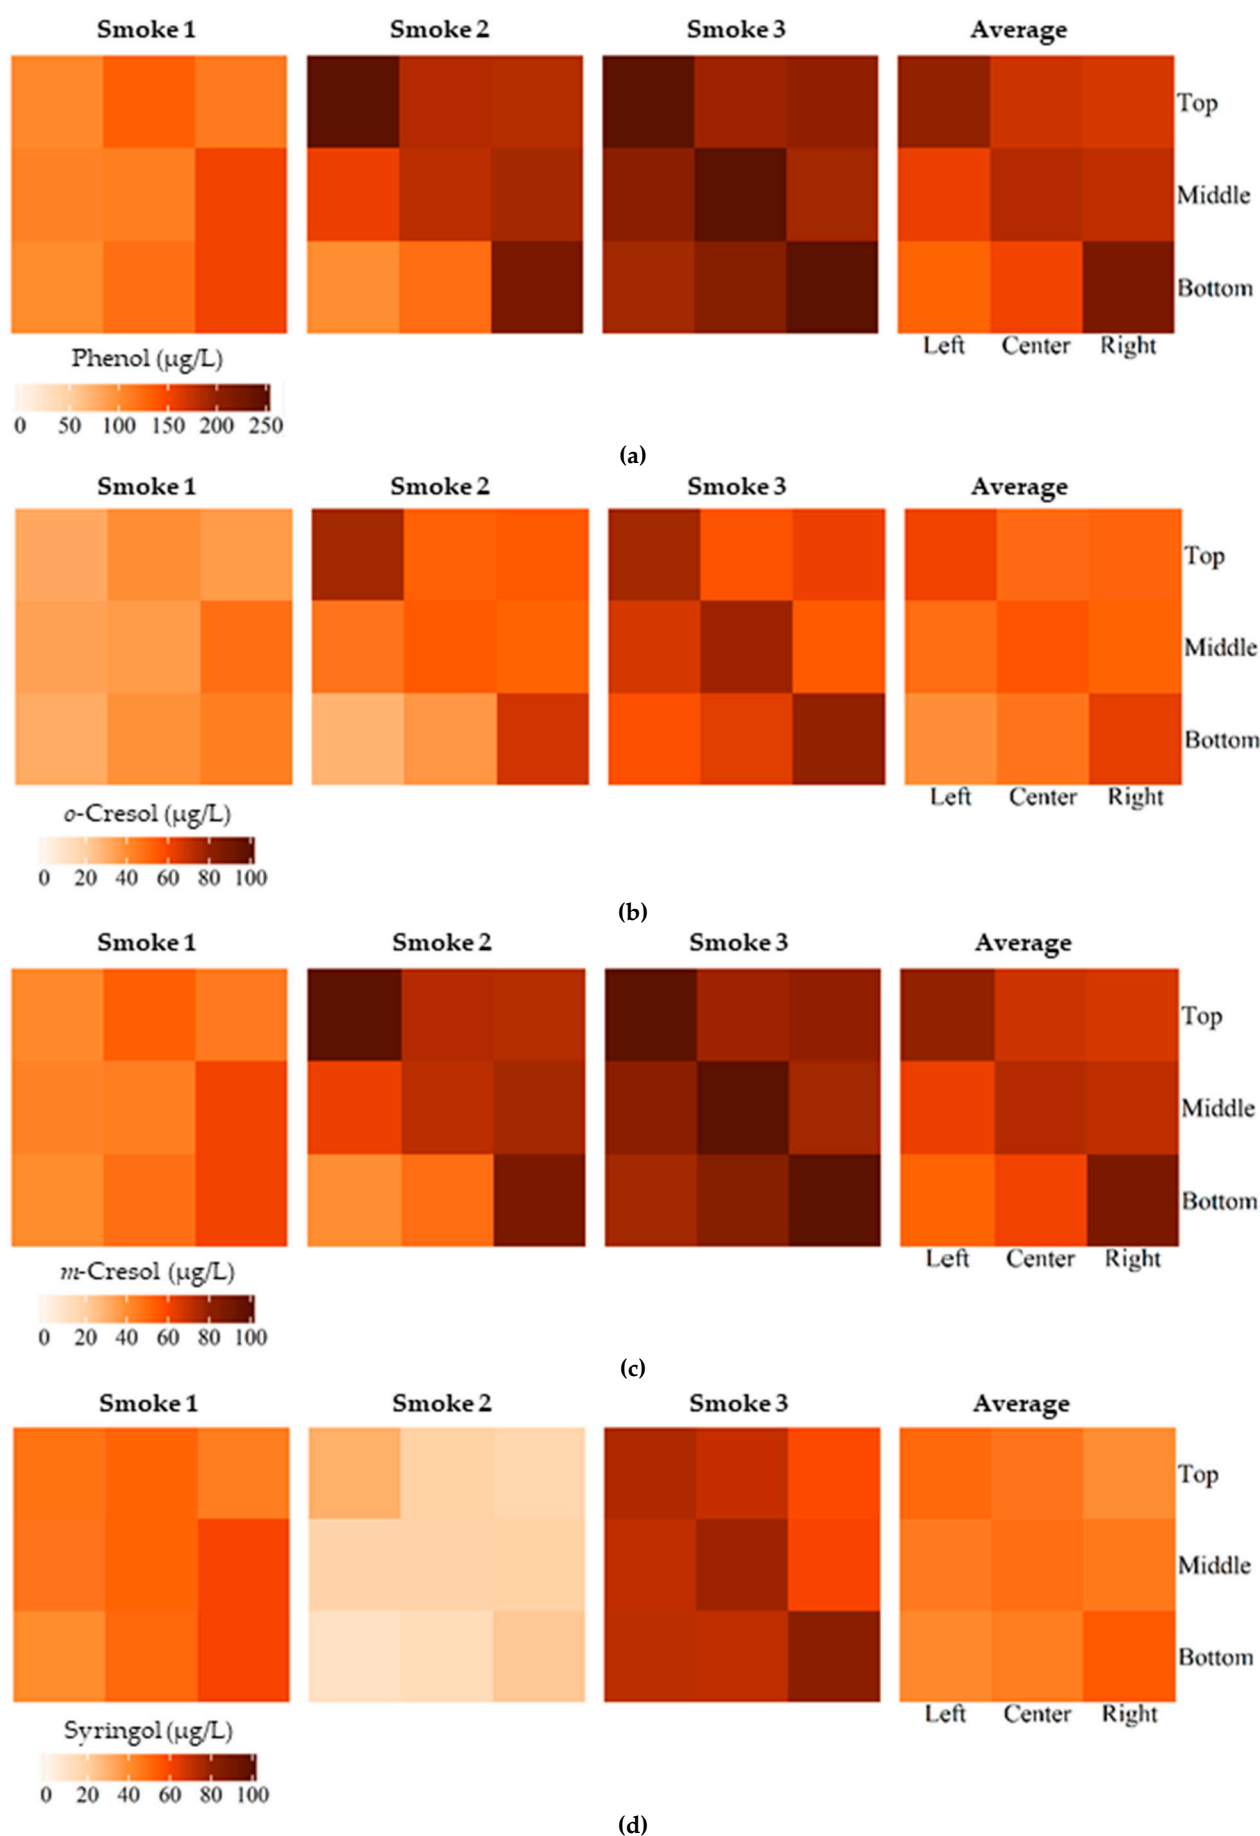

**Figure S1.** Heat maps depicting spatial variation in (a) phenol, (b) *o*-cresol, (c) *m*-cresol, and (d) syringol concentrations of grapes exposed to smoke post-harvest, using the purpose-built smoke box, by replicate smoke treatments and as an average across the three smoke treatments.

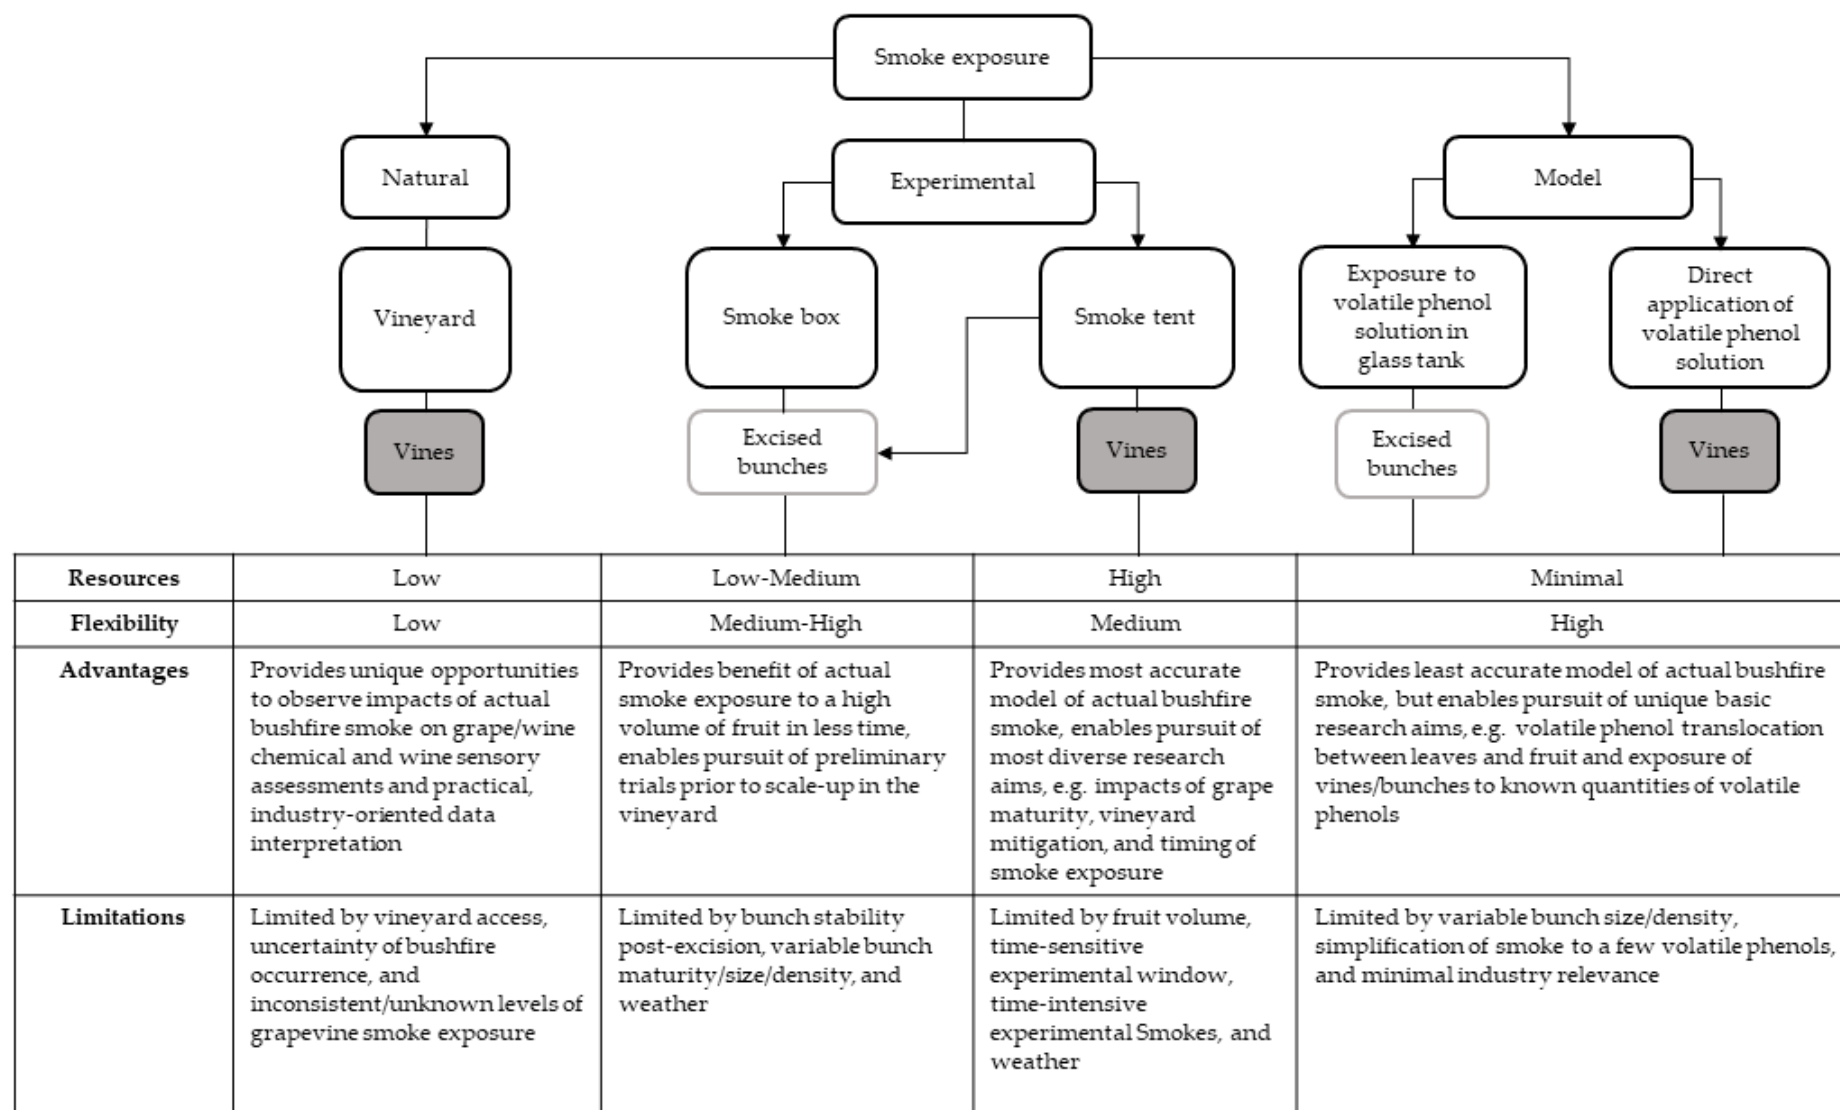

**Figure S2.** Comparison of natural, experimental and model smoke exposure as tools to pursue different smoke taint research aims, and their relative advantages and limitations.

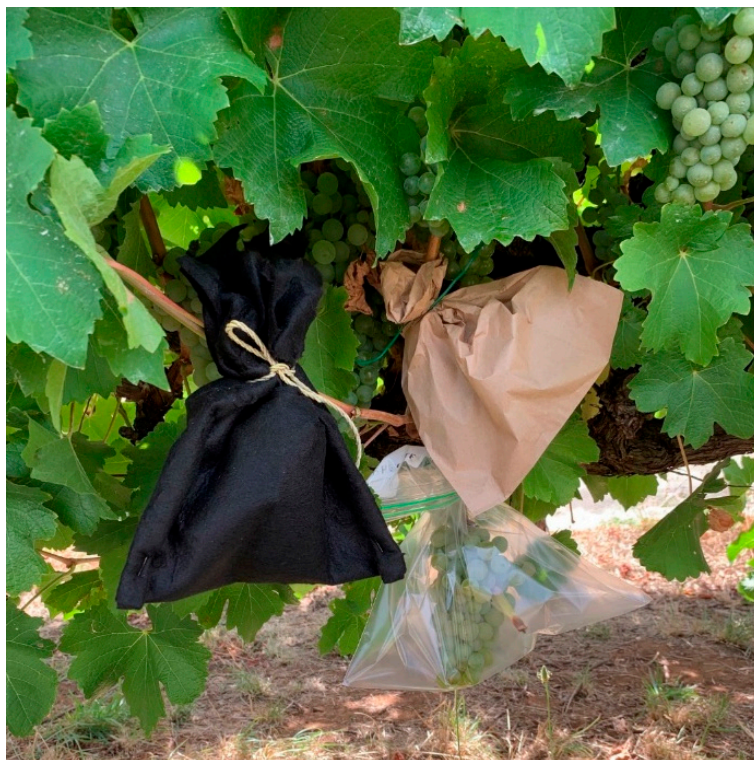

**Figure S3.** Photograph showing Semillon grape bunches enclosed in plastic, paper and activated carbon fabric bags prior to treatments involving grapevine exposure to smoke.
